# Supplementary material for: Effect of mass dihydroartemisinin–piperaquine administration in southern Mozambique on the carriage of molecular markers of antimalarial resistance
Source: PubMed Central journal article supplement (PMC7571678; doi:10.1371/journal.pone.0240174), 2020-10-19
Supplement: pone.0240174.s001.pdf [file pone.0240174.s001.pdf]

**S1 Fig.** Sequencing results of *P. falciparum* samples before (A) and after (B) pre-amplification.

| Sample ID | <i>pfcr</i> |      |      |      |       | <i>K13</i> |        | <i>pfmdr1</i> |        |        |  |
|-----------|-------------|------|------|------|-------|------------|--------|---------------|--------|--------|--|
|           | I66T        | M74I | N75E | K76T | K120E | S477S      | T1069T | Q1195Q        | S1214L | D1246Y |  |
| 17PM27    | M           | W    | W    | W    | M     | W          | W      | W             | W      | W      |  |
| 17PM68    | W           | W    | W    | W    | W     | W          | W      | M             | M      | W      |  |
| 17PM72    | W           | W    | W    | W    | W     | W          | W      | W             | W      | W      |  |
| 17PM73    | W           | W    | W    | W    | W     | W          | W      | W             | W      | W      |  |
| 17PM74    | W           | W    | W    | W    | W     | W          | W      | W             | W      | W      |  |
| 17PM76    | W           | W    | W    | W    | W     | W          | M      | W             | W      | W      |  |
| 17PM77    | W           | W    | W    | W    | W     | W          | W      | W             | W      | W      |  |
| 17PM78    | W           | W    | W    | W    | W     | W          | W      | W             | W      | W      |  |
| 17PM94    | W           | W    | W    | W    | W     | W          | W      | W             | W      | W      |  |
| 17PM96    | W           | W    | W    | W    | W     | W          | W      | W             | W      | W      |  |
| 17PM103   | W           | W    | W    | W    | W     | W          | W      | W             | W      | W      |  |
| 17PM105   | W           | W    | W    | W    | W     | W          | W      | W             | W      | W      |  |
| 17PM111   | W           | W    | W    | W    | W     | W          | W      | W             | W      | W      |  |
| 17PM117   | W           | W    | W    | W    | W     | M          | W      | W             | W      | W      |  |
| L058      | W           | M    | M    | M    | W     | W          | W      | W             | W      | W      |  |
| L060      | W           | M    | M    | M    | W     | W          | W      | W             | W      | W      |  |
| L111      | W           | M    | M    | M    | W     | W          | W      | W             | W      | W      |  |
| L198      | W           | M    | M    | M    | W     | W          | W      | W             | W      | W      |  |
| L214      | W           | M    | M    | M    | W     | W          | W      | W             | W      | W      |  |
| L225      | W           | M    | M    | M    | W     | W          | W      | W             | W      | M      |  |
| L231      | W           | M    | M    | M    | W     | W          | W      | W             | W      | W      |  |

  

| Sample ID | <i>pfcr</i> |      |      |      |       | <i>K13</i> |        | <i>pfmdr1</i> |        |        |  |
|-----------|-------------|------|------|------|-------|------------|--------|---------------|--------|--------|--|
|           | I66T        | M74I | N75E | K76T | K120E | S477S      | T1069T | Q1195Q        | S1214L | D1246Y |  |
| 17PM27    | M           | W    | W    | W    | M     | W          | W      | W             | W      | W      |  |
| 17PM68    | W           | W    | W    | W    | W     | W          | W      | M             | M      | W      |  |
| 17PM72    | W           | W    | W    | W    | W     | W          | W      | W             | W      | W      |  |
| 17PM73    | MD          | MD   | MD   | MD   | MD    | W          | MD     | MD            | MD     | MD     |  |
| 17PM74    | W           | W    | W    | W    | W     | W          | W      | W             | W      | W      |  |
| 17PM76    | W           | W    | W    | W    | W     | W          | M      | W             | W      | W      |  |
| 17PM77    | W           | W    | W    | W    | W     | W          | W      | W             | W      | W      |  |
| 17PM78    | W           | W    | W    | W    | W     | W          | W      | W             | W      | W      |  |
| 17PM94    | W           | W    | W    | W    | W     | W          | W      | W             | W      | W      |  |
| 17PM96    | W           | W    | W    | W    | W     | W          | W      | W             | W      | W      |  |
| 17PM103   | W           | W    | W    | W    | W     | W          | W      | W             | W      | W      |  |
| 17PM105   | W           | W    | W    | W    | W     | W          | W      | W             | W      | W      |  |
| 17PM111   | W           | W    | W    | W    | W     | W          | W      | W             | W      | W      |  |
| 17PM117   | W           | W    | W    | W    | W     | M          | W      | W             | W      | W      |  |
| L058      | W           | M    | M    | M    | W     | W          | W      | W             | W      | W      |  |
| L060      | W           | M    | M    | M    | W     | W          | W      | W             | W      | W      |  |
| L111      | W           | M    | M    | M    | W     | W          | W      | W             | W      | W      |  |
| L198      | W           | M    | M    | M    | W     | W          | W      | W             | W      | W      |  |
| L214      | W           | M    | M    | M    | W     | W          | W      | W             | W      | W      |  |
| L225      | W           | M    | M    | M    | W     | W          | W      | W             | W      | M      |  |
| L231      | W           | M    | M    | M    | W     | W          | W      | W             | W      | W      |  |

M = Mutant allele      W = Wild-type allele      MD = Missing Data
