# Supplementary material for: Effect of mass dihydroartemisinin–piperaquine administration in southern Mozambique on the carriage of molecular markers of antimalarial resistance
Source: PubMed Central journal article supplement (PMC7571678; doi:10.1371/journal.pone.0240174), 2020-10-19
Supplement: pone.0240174.s002.pdf [file pone.0240174.s002.pdf]

**S1 Table.** Main characteristics of study participants.

| <b>Variable</b>                                                   | <b>Pre-MDA (N=99)</b> | <b>Post-MDA (N=112)</b> | <b>p<sup>#</sup></b> |
|-------------------------------------------------------------------|-----------------------|-------------------------|----------------------|
| <b>Period</b>                                                     | Nov 2015              | May 2017                |                      |
| <b>Area, n (%)<sup>*</sup></b>                                    |                       |                         |                      |
| Magude Sede                                                       | 65 (68)               | 59 (53)                 | 0.248                |
| Motaze                                                            | 13 (14)               | 23 (21)                 |                      |
| Panjane                                                           | 6 (6)                 | 9 (8)                   |                      |
| Mahele                                                            | 3 (3)                 | 7 (6)                   |                      |
| Mapulanguene                                                      | 8 (9)                 | 14 (12)                 |                      |
| <b>Sex, n (%)<sup>**</sup></b>                                    |                       |                         |                      |
| Male                                                              | 47 (48)               | 53 (48)                 | 1.000                |
| Female                                                            | 51 (52)               | 58 (52)                 |                      |
| <b>Age (years), mean (SD)<sup>***</sup></b>                       | 14.6 (11.8)           | 12.8 (17.3)             | 0.385                |
| <b>qPCR (parasites/μl), GM (SD)<sup>****</sup></b>                | 90.3 (231.9)          | 117.4 (371.2)           | 0.515                |
| <b>Reported fever in the previous 24 h, n (%)<sup>*****</sup></b> |                       |                         |                      |
| Yes                                                               | 23 (23.2)             | 39 (34.8)               | 0.130                |
| No                                                                | 70 (70.7)             | 72 (64.3)               |                      |

GM, Geometric mean; SD, Standard deviation

<sup>#</sup>Student t (continuous) or Fisher exact (categorical) test

<sup>\*</sup> No data for 4 samples (Pre-MDA)

<sup>\*\*</sup> No data for 2 samples (Pre-MDA=1; Post-MDA=1)

<sup>\*\*\*</sup> No data for 2 samples (Pre-MDA=1; Post-MDA=1)

<sup>\*\*\*\*</sup> No data for 1 samples (Pre-MDA)

<sup>\*\*\*\*\*</sup> No data for 7 samples (Pre-MDA=6; Post-MDA=1)
