# Supplementary material for: Effect of mass dihydroartemisinin–piperaquine administration in southern Mozambique on the carriage of molecular markers of antimalarial resistance
Source: PubMed Central journal article supplement (PMC7571678; doi:10.1371/journal.pone.0240174), 2020-10-19
Supplement: pone.0240174.s003.pdf [file pone.0240174.s003.pdf]

**S2 Table.** Copy number of *pfpm2* and *pfmdr1* in *P. falciparum* isolates from pre- and post-MDA groups.

|                             |         | Pre-MDA (n=61) | Post-MDA (n=59) | P value* |
|-----------------------------|---------|----------------|-----------------|----------|
| <b><i>pfpm2</i> [N(%)]</b>  | ≤1.2    | 46 (75.4)      | 57 (96.6)       | 1.000    |
|                             | 1.2-1.5 | 12 (19.7)      | 0               |          |
|                             | ≥1.5    | 3 (4.9)        | 2 (3.4)         |          |
| <b><i>pfmdr1</i> [N(%)]</b> | ≤1.2    | 55 (90.2)      | 44 (74.6)       | 1.000    |
|                             | 1.2-1.5 | 3 (4.9)        | 12 (20.3)       |          |
|                             | ≥1.5    | 3 (4.9)        | 3 (5.1)         |          |

\*Fisher's exact test (p value for the comparison of *P. falciparum* isolates with multiple copies versus the rest)
